# Supplementary material for: Genome Editing of Golden SNP-Carrying Lycopene Epsilon-Cyclase (LcyE) Gene Using the CRSPR-Cas9/HDR and Geminiviral Replicon System in Rice
Source: MDPI journal article supplement (doi:10.3390/ijms231810383), 2022-09-08
Supplement: s1 [file s1]

## Supplementary Data

### Genome Editing of Golden SNP-Carrying Lycopene Epsilon-Cyclase (*LcyE*)/HDR Gene using the CRSPR-Cas9 and Geminiviral Replicon System in Rice

Jong Hee Kim, Jihyeon Yu, Hee Kyoung Kim, Jin Young Kim, Me-Sun Kim, Yong-Gu Cho, Sangsu Bae, Kwon Kyoo Kang and Yu Jin Jung \*

#### Contents

**Table S1.** Design of sgRNAs for HDR by CRISPR-Cas9 system in rice. using the Cas-designer (<http://www.rgenome.net/cas-designer/>). Under line is PAM sequence.

**Figure S1.** Design of donor template using the CRSPR-Cas9 and geminiviral replicon system.

**Figure S2.** Ti-plasmid vector construction using the CRSPR-Cas9 and geminiviral replicon system (A) pGemBos vector construction (B) Confirmation of donor template into pGemBos::*LcyE* vector (C) Confirmation of sgRNA by sequencing analysis.

**Figure S3.** Confirmation of T-DNA insertion from calli obtained through HDR experiment in rice. M: 1kb DNA ladder; WT: wild-type; P: pGemBos::*LcyE* plasmid vector.

**Table S2.** The primers list used in this study.

**Supplementary Table S1.** Design of sgRNAs for HDR by CRISPR-Cas9 system in rice. using the Cas-designer (<http://www.rgenome.net/cas-designer/>). Under line is PAM sequence.

| sgRNA  | RGEN Target (5' to 3')           | Direction | GC content<br>(%, w/o PAM) | Out-of<br>frame score | Mismatches |   |   |   |
|--------|----------------------------------|-----------|----------------------------|-----------------------|------------|---|---|---|
|        |                                  |           |                            |                       | 0          | 1 | 2 | 3 |
| sgRNA1 | CAGAGAGGAGATGTCTGACA <u>AAGG</u> | -         | 50.0                       | 67.8                  | 1          | 0 | 0 | 0 |
| sgRNA2 | TTGAGCCGGTCGGATCAGAG <u>AGG</u>  | -         | 60.0                       | 77.9                  | 1          | 0 | 0 | 0 |

## LcyE (Os01g0581300) gene

→ donor and primers region, 1116 bp

```

atCCCGGGCCTGGAACCTCTCAAAGTTCAGTCCATCAATGCTTGGTAAGCATTTCTTGAT
-> : Fw1(J169)
ATTTATTCAATTTTATTGACAAGCACACCAGTATTACAAATTGGAGTACATTGCTTCAGA
TGAGGGCAGTATTTAGTATAATTTTGAAATGTGAGAACATTTCTGGTACTAATTGC
TATGCGGTGTTGCAGCATGGAGAACATTATGGCCCAAGAACGAAACGTCAACGATCAT
TCTTCCTTTTGGGCTGGCTTTGATAATCCAACGAATAACGAAGGCATTGAGACATTCT
TTGAAACCTTTTCCGGTTGCCAAATGGTAATTCTACTCTTGATTGCATTGCCTCTGT
TTTCAGTCTATTACAAATACCATTATGTATGACCTGAAGATTGCCACCAACAAGTGT
TCATCACTGTTCTTTGTTACTATCAGGATGTGGCGAGGATTCTTGGTTCGACGCTTCT
TCAGTGGATCTCACTACTCTTGTACTTACATGTTTCAAAATTGCGCCGAACCAATGCGA
ATGAACCTTGTGAGACTTCTGCTCTCGATCCGACCGGCTCAACGATGATCAAGACCTAC
<- : Rv1(J171)          -> : Fw2(J173)
CTGACCTTGTAAACCAATTTCAGCAGTCTACAAGAATATTAGGAAATGTACAGTTTGTG
<- : Rv2(J172)
GTTTGTACATAACATAGTGAGAGCCAGAGGATATGGGGGTTGGGGGTTACTTATCATGC
TAGAACAACAAAACACTGCAAGAATTTATGCATGAATTTGGCAAATGGAATAGATTATG
CAGAATGGGAACACGTGAATACGTGATGCGTGTGCTGGAACAACAAGTAGGAGGAATAAA
ACCCATGGATTATGGATCTTGTAGTGAGTTGCATTATAGCCATTCTTAGGTCTTATCATC
TCTCTCCCTTTCCATTTTACCTCTATCCGTTTTCGACATGCCGGATTACACACCCTA
TTTTAGATAGCTCGGCCAAAATGTTCCACAAACATTTAGAAAAGGAACAAAATGGAAA
GAGGAGAGAAAAAAGAGATGGTGCAAGAATAGTCTGAGGCTATCCTTGTCTCATTGCC
ATGGCATTTAGGTCCAGAGAAGGGTCTAGAGa
<- : Rv3(J170)
  
```

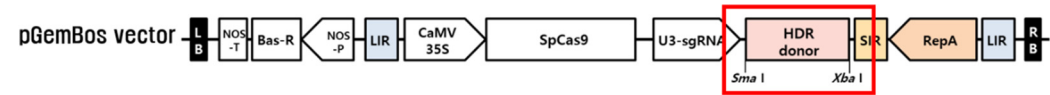

### ○ primer SET 1 : 555bp Section①

OLIGO [start](#) [length](#) [tm](#) [gc%](#) [any](#) [3' seq](#)

LEFT PRIMER 5 20 60.63 55.00 4.00 1.00 GGCCTGGAACCTCTCAAAGT

RIGHT PRIMER 553 20 59.13 40.00 4.00 2.00 TGACAAGGTTTCATTCGCATT

### ○ primer SET 2 : 84bp Section②

OLIGO [start](#) [length](#) [tm](#) [gc%](#) [any](#) [3' seq](#)

LEFT PRIMER 2 18 62.92 50.00 4.00 2.00 ATTGCGCCGAACCAAAATG

RIGHT PRIMER 85 22 58.20 45.45 6.00 2.00 CAGGTAGGTCTTGATCATCGTT

○ Section① + Section② = Section③

### ○ primer SET 3 : 539bp Section④

OLIGO [start](#) [length](#) [tm](#) [gc%](#) [any](#) [3' seq](#)

LEFT PRIMER 7 19 60.36 52.63 6.00 2.00 CGGCTCAACGATGATCAAG

RIGHT PRIMER 543 23 61.79 52.17 6.00 1.00 TCTAGACCCTTCTTCTGGGACCT

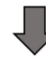

Section①  
(555bp)

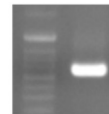

Section③  
(605bp)

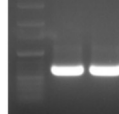

Section④  
(539bp)

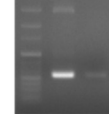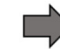

Completed Donor  
(1116bp)

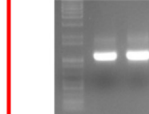

Supplementary Figure S1. Design of donor template using the CRSPR-Cas9 and geminiviral replicon system.

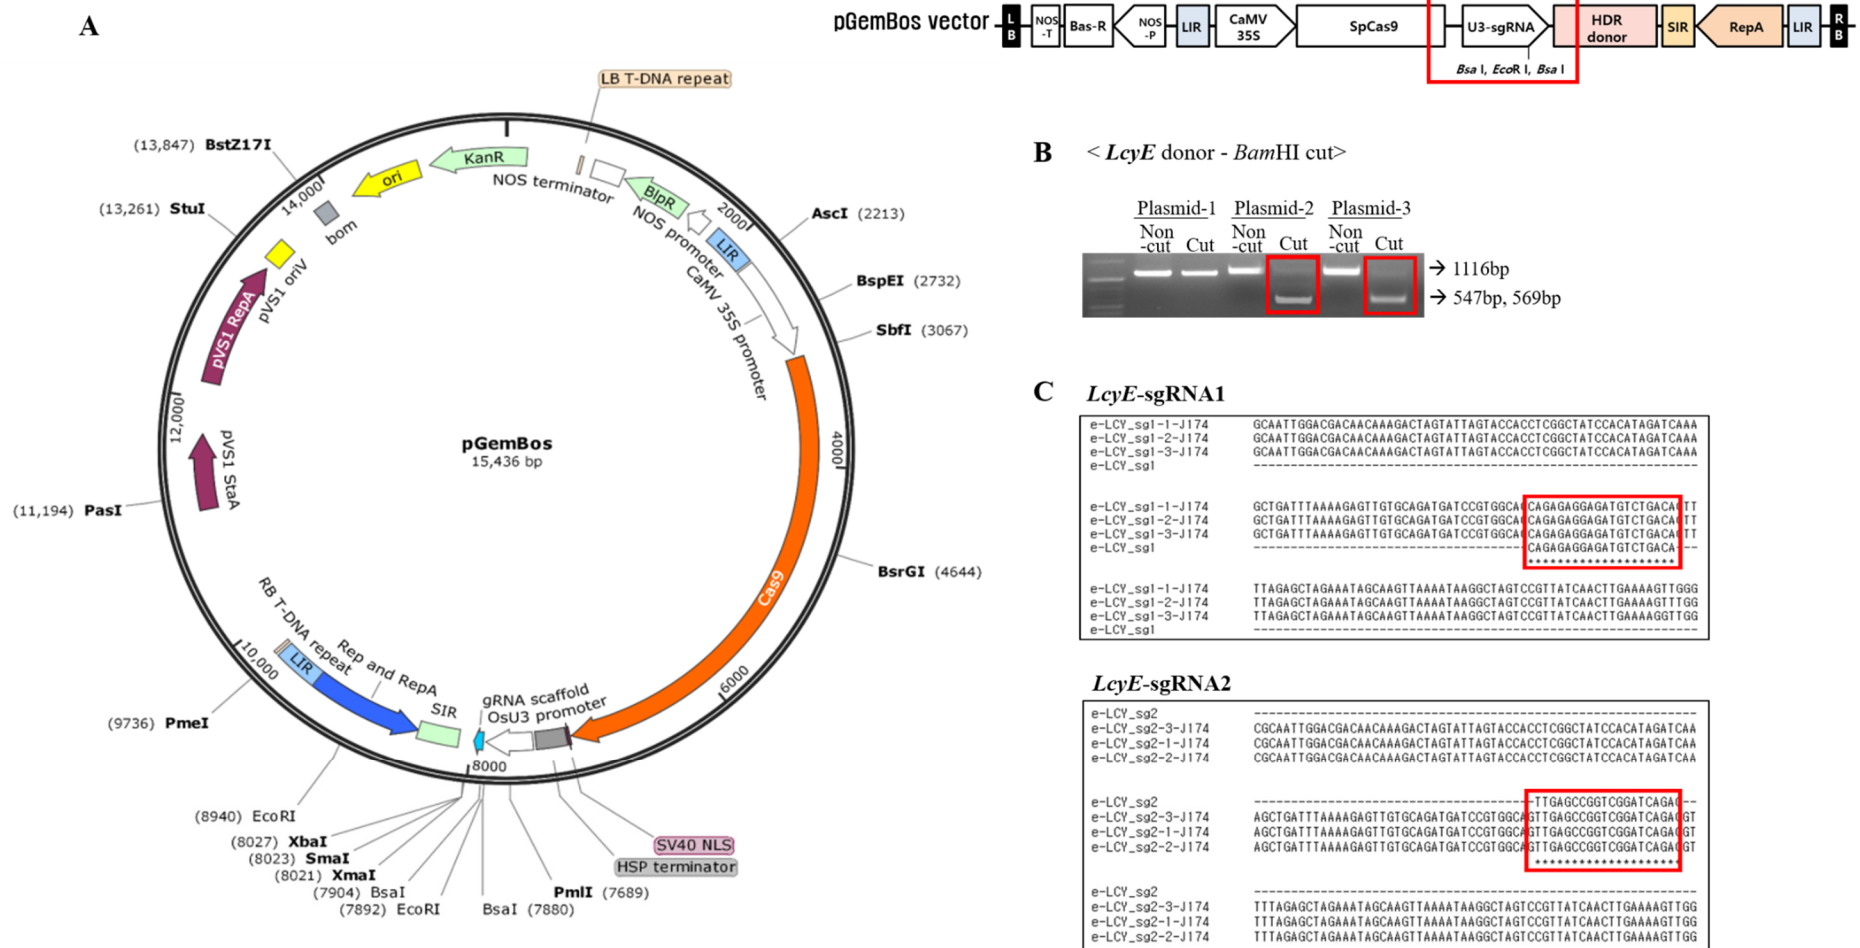

**Supplementary Figure S2.** Ti-plasmid vector construction using the CRSPR-Cas9 and geminiviral replicon system (A) pGemBos vector construction (B) Confirmation of donor template into pGemBos::*LcyE* vector (C) Confirmation of sgRNA by sequencing analysis.

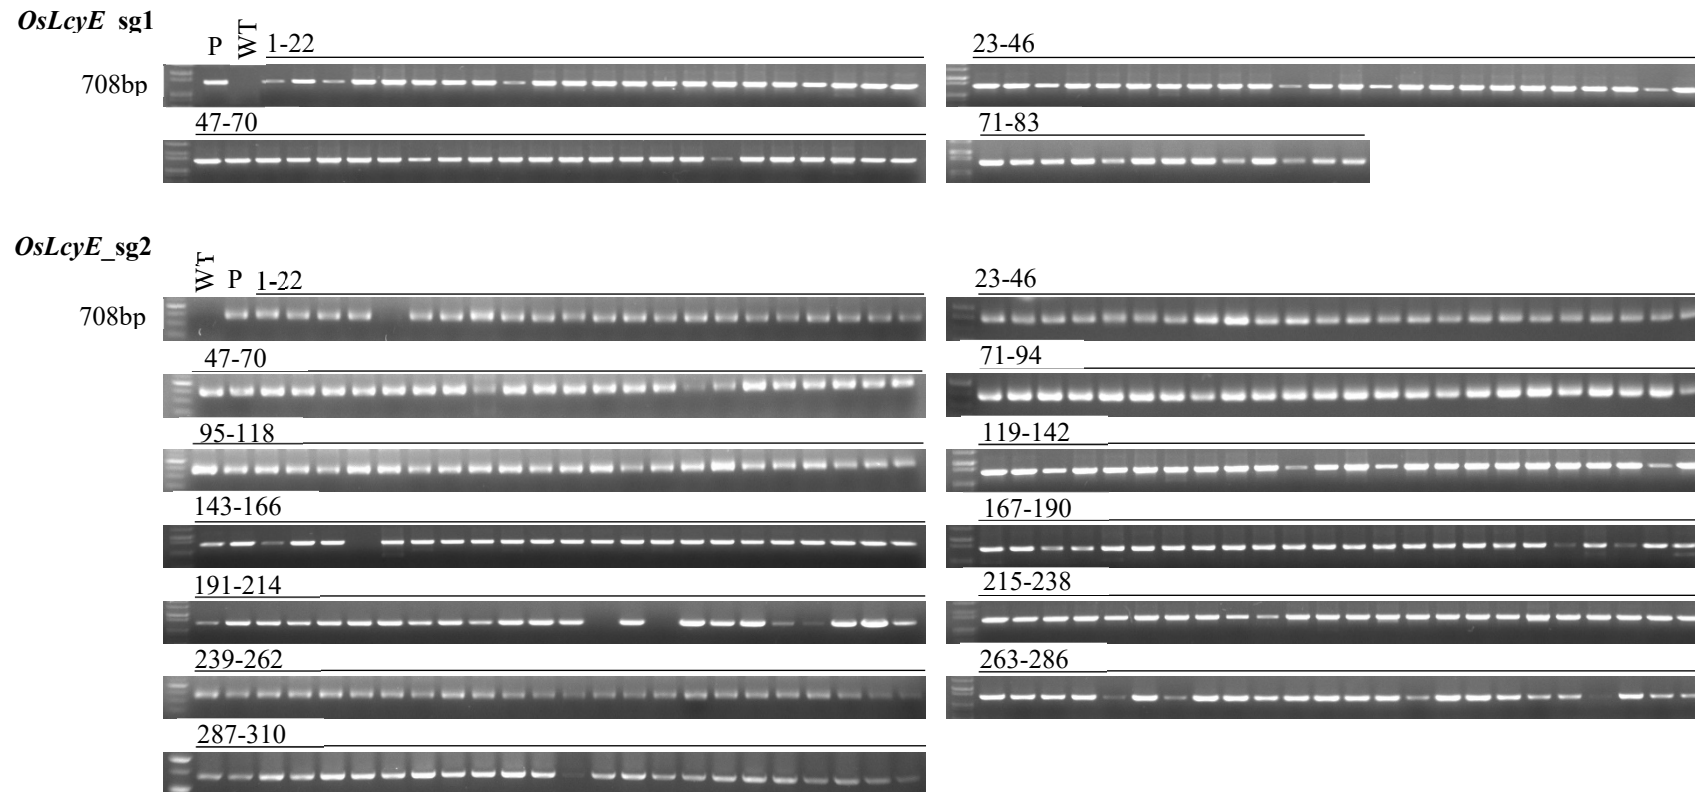

**Supplementary Figure S3.** Confirmation of T-DNA insertion from calli obtained through HDR experiment. M: 1kb DNA ladder; WT: wild-type; P: pGemBos::*LcyE* plasmid vector.

**Supplementary Table S2.** The primers list used in this study.

| Primer name                              | Sequence (primer direction 5'-3')                        |
|------------------------------------------|----------------------------------------------------------|
| <i>LcyE</i> donor 1st Fw                 | TCCTGCAACCGGTACTAACA                                     |
| <i>LcyE</i> donor 1st Rv                 | GTGGTGCAAGGAAGGAGAAG                                     |
| <i>LcyE</i> donor 2nd Fw                 | ATCCCGGGCCTGGAACCTCTCAAAGTTCC                            |
| <i>LcyE</i> donor 2nd Rv                 | TCTCTAGACCCTTCTTCTGGGACCTAAA                             |
| <i>LcyE</i> donor OE-PCR Fw1             | CGGCTCAACGATGATCAAG                                      |
| <i>LcyE</i> donor OE-PCR Rv1             | TGACAAGGTTTCATTTCGCATT                                   |
| <i>LcyE</i> donor OE-PCR Rv2             | CAGGTAGGTCTTGATCATCGTT                                   |
| T-DNA confirm-Nos ter Fw                 | TTGCGCGCTATATTTTGT                                       |
| T-DNA confirm-Bar R Rv                   | CGTCAACCACTACATCGAGA                                     |
| Replicon confirm-Rep Fw                  | TTCTCCCAGAGAAACTGGAA                                     |
| Replicon confirm-35S Rv                  | CCATCTGTGGGTTAGCATTC                                     |
| NGS (Next Generation Sequencing) primers |                                                          |
| <i>LcyE</i> 1st Fw                       | TTCAATTCTTGCAAATTTCTTCA                                  |
| <i>LcyE</i> 1st Rv                       | TCATTTTTGGTCTAGTTACACATCA                                |
| <i>LcyE</i> 2nd Fw                       | ACACTCTTCCCTACACGACGCTCTCCGATCTTCTTTTGGCGTATGAGCAG       |
| <i>LcyE</i> 2nd Rv                       | GTGACTGGAGTTCAGACGTGTGCTCTTCCGATCTGGTCATGTCCTCGGTGAACT   |
| <i>LcyE</i> 3rd-1                        | AATGATACGGCGACCACCGAGATCTACACtatagcctACACTCTTCCCTACACGAC |
| <i>LcyE</i> 3rd-2                        | AATGATACGGCGACCACCGAGATCTACACatagaggcACACTCTTCCCTACACGAC |

|                    |                                                           |
|--------------------|-----------------------------------------------------------|
| <i>LcyE</i> 3rd-3  | AATGATACGGCGACCACCGAGATCTACACcctatcctACACTCTTTCCCTACACGAC |
| <i>LcyE</i> 3rd-4  | AATGATACGGCGACCACCGAGATCTACACggctctgaACACTCTTTCCCTACACGAC |
| <i>LcyE</i> 3rd-5  | AATGATACGGCGACCACCGAGATCTACACaggcgaagACACTCTTTCCCTACACGAC |
| <i>LcyE</i> 3rd-6  | AATGATACGGCGACCACCGAGATCTACACtaatcttaACACTCTTTCCCTACACGAC |
| <i>LcyE</i> 3rd-7  | AATGATACGGCGACCACCGAGATCTACACcaggacgtACACTCTTTCCCTACACGAC |
| <i>LcyE</i> 3rd-8  | AATGATACGGCGACCACCGAGATCTACACgtactgacACACTCTTTCCCTACACGAC |
| <i>LcyE</i> 3rd-9  | CAAGCAGAAGACGGCATACGAGATcgagtaatGTGACTGGAGTTCAGACGTGT     |
| <i>LcyE</i> 3rd-10 | CAAGCAGAAGACGGCATACGAGATtctccggaGTGACTGGAGTTCAGACGTGT     |
| <i>LcyE</i> 3rd-11 | CAAGCAGAAGACGGCATACGAGATaatgagcgGTGACTGGAGTTCAGACGTGT     |
| <i>LcyE</i> 3rd-12 | CAAGCAGAAGACGGCATACGAGATggaatctcGTGACTGGAGTTCAGACGTGT     |
| <i>LcyE</i> 3rd-13 | CAAGCAGAAGACGGCATACGAGATttctgaatGTGACTGGAGTTCAGACGTGT     |
| <i>LcyE</i> 3rd-14 | CAAGCAGAAGACGGCATACGAGATacgaattcGTGACTGGAGTTCAGACGTGT     |
| <i>LcyE</i> 3rd-15 | CAAGCAGAAGACGGCATACGAGATagcttcagGTGACTGGAGTTCAGACGTGT     |
| <i>LcyE</i> 3rd-16 | CAAGCAGAAGACGGCATACGAGATgcgcataGTGACTGGAGTTCAGACGTGT      |
| <i>LcyE</i> 3rd-17 | CAAGCAGAAGACGGCATACGAGATcatagccgGTGACTGGAGTTCAGACGTGT     |
| <i>LcyE</i> 3rd-18 | CAAGCAGAAGACGGCATACGAGATtcgcggaGTGACTGGAGTTCAGACGTGT      |
| <i>LcyE</i> 3rd-19 | CAAGCAGAAGACGGCATACGAGATgcgcgagaGTGACTGGAGTTCAGACGTGT     |
| <i>LcyE</i> 3rd-20 | CAAGCAGAAGACGGCATACGAGATctatcgctGTGACTGGAGTTCAGACGTGT     |

---
